# Supplementary material for: Continuum solvent effects on various isomers of bilirubin
Source: Royal Society of Chemistry journal article supplement (doi:10.1039/b004476h), 2000-01-01
Supplement: tables.doc [file tables.doc]

Table 1. Relative stabilitya in vacuo and in solution (kcal/mol) of various ZZ conformers of bilirubin computed at the HF/6-31G*//HF/3-21G level. The electrostatic solvent effect, cavitation, dispersion and repulsion contributions to the solvation free energy are reported, together with the cavity surface (Å2) and volume (Å3) and the relevant number of intramolecular H-bonds.

| Conformer (1,2) | ESCF | G | G | G | G | Gcav | Gdis | Grep | Gnon-el | Surface | Volume | H-bond |
| --- | --- | --- | --- | --- | --- | --- | --- | --- | --- | --- | --- | --- |
| **1**  62°, 62°) | 0. | -17.89 | 0. | 0. | 0. | 62.43 | -57.73 | 10.28 | 0. | 546.4764 | 665.4239 | 6 |
| **2**  49.6°, 50.2°) | 24.99 | -41.98 | -24.09 | -24.32 | 0.67 | 66.46 | -64.26 | 12.55 | -0.23 | 623.8595 | 689.1978 | 0 |
| **3**  60°, 60°) | 25.37 | -41.35 | -23.46 | -23.10 | 2.27 | 66.52 | -63.45 | 12.26 | 0.36 | 621.4625 | 689.7373 | 0 |
| **4**  75°, 30°) | 14.69 | -20.92 | -3.03 | -1.36 | 13.33 | 63.41 | -56.88 | 10.11 | 1.66 | 552.0486 | 671.9694 | 5 |
| **5**  75°, 30°) | 25.74 | -43.22 | -25.33 | -25.19 | 0.55 | 66.49 | -63.97 | 12.60 | 0.14 | 621.6115 | 687.5899 | 0 |
| **6**  75°, 0°) | 18.23 | -29.92 | -12.03 | -11.22 | 7.01 | 64.09 | -59.93 | 11.63 | 0.81 | 576.5531 | 675.8338 | 2 |
| **7**  75°, 0°) | 33.86 | -40.65 | -22.76 | -19.85 | 14.02 | 65.58 | -59.97 | 12.28 | 2.91 | 594.5002 | 692.6393 | 0 |
| **8**  75°, -30°) | 22.46 | -30.45 | -12.56 | -10.74 | 11.74 | 64.23 | -59.00 | 11.56 | 1.81 | 572.5722 | 677.3050 | 2 |
| **9**  60°, -60°) | 30.62 | -28.87 | -10.98 | -6.34 | 24.28 | 64.89 | -55.98 | 10.71 | 4.64 | 555.9485 | 680.3534 | 1 |
| **10**  60°, -60°) | 30.97 | -33.62 | -15.73 | -10.89 | 20.08 | 65.64 | -57.07 | 11.24 | 4.83 | 569.8246 | 688.4032 | 0 |
| **11**  180°, 0°) | 38.86 | -39.32 | -21.43 | -21.67 | 17.18 | 65.83 | -63.41 | 12.31 | -0.24 | 604.3081 | 680.3536 | 1 |
| **12**  180°, 0°) | 43.85 | -36.33 | -18.44 | -17.45 | 26.40 | 65.52 | -61.14 | 11.58 | 0.98 | 589.1268 | 681.2068 | 0 |

a Reference values for the 1 = 2 = 62° conformer (**1**): ESCF = -1781.493477 hartrees; G= -1781.498113 hartrees; G= -2.91 kcal/mol; Gnon-el = Gcav + Gdis + Grep = 14.98 kcal/mol.

Table 3. Relative stabilitya in vacuo and in solution (kcal/mol) of various isomers of bilirubin computed at the HF/6-31G*//HF/6-31G*(vac) level. The electrostatic solvent effect, cavitation, dispersion and repulsion contributions to the solvation free energy are reported, together with the cavity surface (Å2) and volume (Å3) and the relevant number of intramolecular H-bonds.

| Isomer (1,2) | ESCF | G | G | G | G | Gcav | Gdis | Grep | Gnon-el | Surface | Volume | H-bond |
| --- | --- | --- | --- | --- | --- | --- | --- | --- | --- | --- | --- | --- |
| **i**ZZ (59.3°, 59.1°) | 0. | -17.48 | 0. | 0. | 0. | 63.96 | -57.81 | 10.35 | 0. | 553.6685 | 671.3555 | 6 |
| **i**ZE (55.1°, 62.2°) | 11.07 | -21.86 | -4.38 | -3.39 | 7.68 | 64.64 | -57.77 | 10.62 | 0.99 | 558.6394 | 676.1234 | 4 |
| **i**EZ (60.3°, 53.4°) | 18.76 | -27.41 | -9.93 | -8.09 | 10.67 | 65.07 | -57.66 | 10.95 | 1.86 | 556.5609 | 681.1846 | 3 |
| **i**EE (62.1°, 46.3°) | 36.45 | -36.71 | -19.23 | -16.81 | 19.64 | 65.94 | -58.92 | 11.91 | 2.43 | 573.4704 | 686.6733 | 0 |
| **ii**ZZ (49.7°, 50.2°) | 29.14 | -42.47 | -24.99 | -27.06 | 2.08 | 66.41 | -64.68 | 12.70 | -2.07 | 626.6831 | 684.1342 | 0 |
| **vi**ZZ (75°, 0°) | 19.63 | -29.61 | -12.13 | -11.80 | 7.83 | 65.12 | -59.94 | 11.66 | 0.34 | 582.7338 | 678.5816 | 2 |
| **x**ZZ (60°, -60°) | 32.09 | -33.30 | -15.82 | -12.31 | 19.78 | 66.43 | -57.90 | 11.49 | 3.52 | 579.622 | 691.088 | 0 |

a The reference conformer (**i**ZZ, with 1 = 59.3°, 2 = 59.1°) values are: ESCF =-1781.507335 hartrees; G=-0.97 kcal/mol; G=-1781.508882 hartrees; Gnon-el=16.50 kcal/mol.
